# Supplementary material for: A deafening silence: a lack of data and reproducibility in published bioacoustics research?
Source: Biodivers Data J. 2019 Oct 30;7:e36783. doi: 10.3897/BDJ.7.e36783 (PMC6834726; doi:10.3897/BDJ.7.e36783)
Supplement: Supplementary material 2 — Scoring of Articles (Excel) [file bdj-07-e36783-s002.xlsx]

## Sheet: oo_304447
Journal	Short Journal	Title	Volume	DOI	Statement of Deposition	Stated Availability	Consensus Online Availability	Consensus Online Method	Consensus Problem	Notes	SV - Recordings Explicitly Available
Bioacoustics	Bioacoustics	Echolocation call description of 15 species of Middle-Eastern desert dwelling insectivorous bats	26	10.1080/09524622.2016.1247386	0	None	None				No
Bioacoustics	Bioacoustics	Non-invasive acoustic detection of wolves	26	10.1080/09524622.2016.1260052	0	None	None				No
Bioacoustics	Bioacoustics	Near-synchronous calling in the hip-pocket frog Assa darlingtoni	26	10.1080/09524622.2016.1260054	0	None	None				No
Bioacoustics	Bioacoustics	Sensitivity of California Thrashers (Toxostoma redivivum) to song syntax	26	10.1080/09524622.2016.1274917	1	Complete	Complete	Personal Website		On ucla.edu site linked to author	Yes
Bioacoustics	Bioacoustics	Bull bellows and bugles: a remarkable convergence of low and high-frequency vocalizations between male domestic cattle Bos taurus and the rutting calls of Siberian and North American wapiti	26	10.1080/09524622.2016.1275805	1	Sample	Sample	Repository			Sample recordings in figshare, linked through supp. data
Bioacoustics	Bioacoustics	The acoustic repertoire of Cavia intermedia as a contribution to the understanding of the Caviidae communication system	26	10.1080/09524622.2016.1278401	0	None	None				No
Bioacoustics	Bioacoustics	Who shall I say is calling? Validation of a caller recognition procedure in Bornean flanged male orangutan (Pongo pygmaeus wurmbii) long calls	26	10.1080/09524622.2016.1216802	0	None	None				No
Bioacoustics	Bioacoustics	The spectral structure of vocalizations match hearing sensitivity but imprecisely in Philautus odontotarsus	26	10.1080/09524622.2016.1221778	0	None	None				No
Bioacoustics	Bioacoustics	Fish choruses off Port Hedland, Western Australia	26	10.1080/09524622.2016.1227940	0	None	None				No
Bioacoustics	Bioacoustics	Echolocation calls of free-flying common vampire bats Desmodus rotundus (Chiroptera: Phyllostomidae) in Chile	26	10.1080/09524622.2016.1231079	0	None	None				No
Bioacoustics	Bioacoustics	Songbird tap dancing produces non-vocal sounds	26	10.1080/09524622.2016.1231080	1	Sample	Sample	Supplementary Material			Some sample data in supplementary material
Bioacoustics	Bioacoustics	Repeated call sequences and behavioural context in long-finned pilot whales off Cape Breton, Nova Scotia, Canada	26	10.1080/09524622.2016.1233457	1	Sample	Sample	Supplementary Material			Some sample data in supplementary material
Bioacoustics	Bioacoustics	Individual variation in the booming calls of captive Horned Guans (Oreophasis derbianus): an endangered Neotropical mountain bird	26	10.1080/09524622.2016.1233513	0	None	None				No
Bioacoustics	Bioacoustics	Sequential organization in the song of thrush nightingale (Luscinia luscinia): clustering and sequential order of the song types	26	10.1080/09524622.2016.1239132	0	None	None				No
Bioacoustics	Bioacoustics	Discomfort-related changes in pup ultrasonic calls of fat-tailed gerbils Pachyuromys duprasi	26	10.1080/09524622.2016.1164076	0	None	None				No
Bioacoustics	Bioacoustics	Description of whistles of Irrawaddy dolphins (Orcaella brevirostris) from the waters of Matang, Peninsular Malaysia	26	10.1080/09524622.2016.1169558	0	None	None				No
Bioacoustics	Bioacoustics	What‚Äôs occurring? Ultrasonic signature whistle use in Welsh bottlenose dolphins (Tursiops truncatus)	26	10.1080/09524622.2016.1174885	0	None	None				No
Bioacoustics	Bioacoustics	A test of the Acoustic Adaptation Hypothesis in three types of tropical forest: degradation of male and female Rufous-and-white Wren songs	26	10.1080/09524622.2016.1181574	0	None	None				No
Bioacoustics	Bioacoustics	Predicting species identity of bumblebees through analysis of flight buzzing sounds	26	10.1080/09524622.2016.1190946	1	None	None			(Possibly at http://animal-sounds.ijs.si/database/bumblebees)	No - implicitly at http://animal-sounds.ijs.si/database/bumblebees
Bioacoustics	Bioacoustics	The acoustic repertoire of lycaenid butterfly larvae	26	10.1080/09524622.2016.1197151	0	None	None				No
ZooKeys	ZooKeys	A new species of Scinax from the Purus-Madeira interfluve, Brazilian Amazonia (Anura, Hylidae)	706	10.3897/zookeys.706.14691	0	None	None				No
ZooKeys	ZooKeys	The acoustic repertoire of the Atlantic Forest Rocket Frog and its consequences for taxonomy and conservation (Allobates, Aromobatidae)	692	10.3897/zookeys.692.12187	1	Complete	None			Fonoteca Neotropical Jacques Vielliard	Yes, places of deposit referenced but not available online
ZooKeys	ZooKeys	A new species of Pristimantis from eastern Brazilian Amazonia (Anura, Craugastoridae)	687	10.3897/zookeys.687.13221	0	None	None				No
ZooKeys	ZooKeys	A new, morphologically cryptic bush-cricket discovered on the basis of its song in the Carpathian Mountains (Insecta, Orthoptera, Tettigoniidae)	680	10.3897/zookeys.680.12835	0	None	None				No
ZooKeys	ZooKeys	The advertisement call and comments on the distribution of Eleutherodactylus bilineatus Bokermann, 1975, an endemic frog of Bahia State, Brazil (Amphibia, Anura)	677	10.3897/zookeys.677.12309	0	None	None				No
ZooKeys	ZooKeys	A marvelous new glassfrog (Centrolenidae, Hyalinobatrachium) from Amazonian Ecuador	673	10.3897/zookeys.673.12108	0	None	None				No
ZooKeys	ZooKeys	Molecular, morphological and acoustic assessment of the genus Ophryophryne (Anura, Megophryidae) from Langbian Plateau, southern Vietnam, with description of a new species	672	10.3897/zookeys.672.10624	1	Complete	None			Fonoteca Zoologica	Yes		http://www.fonozoo.com
ZooKeys	ZooKeys	The unexpected finding of Parapholidoptera castaneoviridis in south-eastern Romania (Insecta, Orthoptera, Tettigoniidae)	643	10.3897/zookeys.643.10645	0	None	None				No
ZooKeys	ZooKeys	The first species of Aplastodiscus endemic to the Brazilian Cerrado (Anura, Hylidae)	642	10.3897/zookeys.642.10401	1	Complete	None			Cole√ß√£o de Anuros da Universidade Federal de Uberl√¢ndia	Yes
ZooKeys	ZooKeys	Systematics of Ecnomiohyla tuberculosa with the description of a new species and comments on the taxonomy of Trachycephalus typhonius (Anura, Hylidae)	630	10.3897/zookeys.630.9298	1	Complete	Complete	Repository		Sound Archive of Museo de Zoolog√≠a of Pontificia Universidad Cat√≥lica del Ecuador (available at AmphibiaWebEcuador website, http://zoologia.puce.edu.ec/vertebrados/anfibios/)	Yes
ZooKeys	ZooKeys	Uncovering the diversity in the Amazophrynella minuta complex: integrative taxonomy reveals a new species of Amazophrynella (Anura, Bufonidae) from southern Peru	563	10.3897/zookeys.563.6084	0	Complete	Complete			Used previously published call.	No
ZooKeys	ZooKeys	Acoustic, genetic and morphological variations within the katydid Gampsocleis sedakovii (Orthoptera, Tettigonioidea)	529	10.3897/zookeys.529.6043	0	None	None				No
ZooKeys	ZooKeys	A new species of the Boophis rappiodes group (Anura, Mantellidae) from the Sahamalaza Peninsula, northwest Madagascar, with acoustic monitoring of its nocturnal calling activity	435	10.3897/zookeys.435.7383	1	Sample	Sample	Supplementary Material			Yes
ZooKeys	ZooKeys	Systematics of treefrogs of the Hypsiboas calcaratus and Hypsiboas fasciatus species complex (Anura, Hylidae) with the description of four new species	370	10.3897/zookeys.370.6291	1	Complete	Complete	Repository		audio archive of the QCAZ and are available at the AmphibiaWebEcuador website (http://zoologia.puce.edu.ec/vertebrados/anfibios/)	Yes
ZooKeys	ZooKeys	First song descriptions of some Anatolian species of Tettigoniidae Krauss, 1902 (Orthoptera, Ensifera)	369	10.3897/zookeys.369.5864	0	None	None				No
ZooKeys	ZooKeys	Morphology, bioacoustics, and ecology of Tibicen neomexicensis sp. n., a new species of cicada from the Sacramento Mountains in New Mexico, U.S.A. (Hemiptera, Cicadidae, Tibicen)	337	10.3897/zookeys.337.5950	1	Sample	Sample	Supplementary Material			Yes
ZooKeys	ZooKeys	New distributional and bioacoustic data about Cicadivetta goumenissa from Peloponnese, Greece (Hemiptera, Cicadidae)	319	10.3897/zookeys.319.4452	1	Complete	Sample	Repository		Collected specimens are deposited in the collection of the Slovenian Museum of Natural History (PMSL). Song recordings are deposited in the Slovenian Wildlife Sound Archive of the same museum. A sample of a selected recording is available on the web pages Songs of European singing cicadas (http://www.cicadasong.eu).	Yes
ZooKeys	ZooKeys	Morphological and acoustic characters of Cicadatra platyptera Fieber, 1876	296	10.3897/zookeys.296.4855	0	None	None				No
ZooKeys	ZooKeys	Acoustic analysis reveals a new cryptic bush‚Äìcricket in the Carpathian Mountains (Orthoptera, Phaneropteridae)	254	10.3897/zookeys.254.3892	1	Sample	Sample	Supplementary Material			Yes
ZooKeys	ZooKeys	A new golden frog species of the genus Diasporus (Amphibia, Eleutherodactylidae) from the Cordillera Central, western Panama	196	10.3897/zookeys.196.2774	1	Sample	Sample	Supplementary Material			Yes
Zootaxa	Zootaxa	A new species of direct-developing frog of the genus Pristimantis (Anura: Terrarana: Craugastoridae) from Cordillera del C√≥ndor, Ecuador, with comments on threats to the anuran fauna of the region	4353	10.11646/zootaxa.4353.3.3	0	None	None				No
Zootaxa	Zootaxa	The Vietnamese population of Megophrys kuatunensis (Amphibia: Megophryidae) represents a new species of Asian horned frog from Vietnam and southern China	4344	10.11646/zootaxa.4344.3.3	0	None	None				No
Zootaxa	Zootaxa	A revision of the Myopsalta crucifera (Ashton) species group (Hemiptera: Cicadidae: Cicadettini) with 14 new species from mainland Australia	4340	10.11646/zootaxa.4340.1.1	1	Sample	Sample	Repository			Representative sample will be deposited at BioAcoustica
Zootaxa	Zootaxa	A new species of Phyllodytes (Anura: Hylidae) from the Atlantic Rainforest of southern Bahia, Brazil	4337	10.11646/zootaxa.4337.4.9	0	None	None				No
Zootaxa	Zootaxa	A new genus and other new species of Agraeciini from the Eastern Arc Mountains, East Africa (Orthoptera: Tettigoniidae; Conocephalinae; Agraeciini)	4311	10.11646/zootaxa.4311.1.1	0	None	None				No
Zootaxa	Zootaxa	Uncovering a hidden diversity: two new species of Breviceps (Anura: Brevicipitidae) from northern KwaZulu-Natal, South Africa	4300	10.11646/zootaxa.4300.2.3	0	None	None				No
Zootaxa	Zootaxa	The Gomphocerinae Tarbinsky, 1932 (Orthoptera: Acrididae) fauna of the Turkish Thrace	4299	10.11646/zootaxa.4299.3.3	0	None	None				No
Zootaxa	Zootaxa	A new species of Miogryllus Saussure, 1877 and new record of Miogryllus piracicabensis Piza, 1960 (Orthoptera: Gryllidae) from State of Rio Grande do Sul, Brazil, with calling song and chromosome complement	4291	10.11646/zootaxa.4291.2.8	0	None	None				No
Zootaxa	Zootaxa	Anurogryllus Saussure, 1877 (Orthoptera: Gryllidae: Gryllinae) from southern Brazil: new species and new records	4290	10.11646/zootaxa.4290.3.9	0	None	None				No
Zootaxa	Zootaxa	Description of four new species of Burrowing Frogs in the Fejervarya rufescens complex (Dicroglossidae) with notes on morphological affinities of Fejervarya species in the Western Ghats	4277	10.11646/zootaxa.4277.4.1	0	None	None				No
Zootaxa	Zootaxa	A new species of Leptolalax (Anura: Megophryidae) from Vietnam	4273	10.11646/zootaxa.4273.1.5	0	None	None				No
Zootaxa	Zootaxa	A revision of the Ewartia oldfieldi (Distant) species complex (Hemiptera: Cicadidae: Cicadettinae) with five new species from eastern and northern Australia	4263	10.11646/zootaxa.4263.3.1	1	Complete	None	Personal Website	Not found on URL stated	http://hydrodictyon.eeb.uconn.edu/projects/cicada/simon_lab/simonlab.php	References recordings held by Simon Lab, but couldn't find any on the website given
Zootaxa	Zootaxa	Revision of the genus Amytta (Orthoptera: Tettigoniidae, Meconematinae) and new species from East Africa	4263	10.11646/zootaxa.4263.2.5	0	None	None				No
Zootaxa	Zootaxa	The dark side of pumpkin toadlet: a new species of Brachycephalus (Anura: Brachycephalidae) from Serra do Brigadeiro, southeastern Brazil	4258	10.11646/zootaxa.4258.4.2	0	None	None				No
Zootaxa	Zootaxa	The genus Phlesirtes Bolivar, 1922 (Orthoptera: Tettigoniidae: Conocephalinae, Conocephalini; Karniellina), a review of the genus with data on its bioacoustics and the description of new species	4244	10.11646/zootaxa.4244.4.1	0	None	None				No
Zootaxa	Zootaxa	A new species of Leptolalax (Anura: Megophryidae) from northern Vietnam	4243	10.11646/zootaxa.4243.3.7	0	None	None				No
Zootaxa	Zootaxa	Description of four new genera and five new species of cicadas from New Caledonia (Insecta: Hemiptera, Cicadoidea, Cicadidae)	4243	10.11646/zootaxa.4243.1.4	0	None	None				No
Zootaxa	Zootaxa	A new species of Phyllodytes Wagler, 1830 (Anura, Hylidae) from the Atlantic Forest of southern Bahia, Brazil	4238	10.11646/zootaxa.4238.1.11	0	None	None				No
Zootaxa	Zootaxa	New species of Endecous (Grylloidea, Phalangopsidae, Luzarinae) from the Igua√ßu National Park (Brazil), including bioacoustics, cytogenetic and distribution data	4237	10.11646/zootaxa.4237.3.2	0	None	None				No
Zootaxa	Zootaxa	A new species of Megatibicen endemic to Mescalero-Monahans shinnery sands (Hemiptera: Auchenorrhyncha: Cicadidae)	4236	10.11646/zootaxa.4236.3.9	1	Sample	None	Repository	Wrong Repository URL; Not deposited in repository	Wrong depository URL, not deposited.	Representative sample will be deposited at BioAcoustica
Journal of Animal Behaviour	JAB	Eavesdropping avoidance and sound propagation: the acoustic structure of soft song	134	10.1016/j.anbehav.2017.10.008	0	None	None				No
Journal of Animal Behaviour	JAB	Structural variability and communicative complexity in acoustic communication	134	10.1016/j.anbehav.2016.06.012	0	None	None				No
Journal of Animal Behaviour	JAB	Predator counteradaptations: stealth echolocation overcomes insect sonar-jamming and evasive-manoeuvring defences	132	10.1016/j.anbehav.2017.08.018	1	Sample	Sample	Supplementary Material			Some sample video + audio in supp materials
Journal of Animal Behaviour	JAB	Mobbing calls: a signal transcending species boundaries	131	10.1016/j.anbehav.2017.07.004	0	None	None				No
Journal of Animal Behaviour	JAB	Effects of lifetime exposure to artificial light at night on cricket (Teleogryllus commodus) courtship and mating behaviour	129	10.1016/j.anbehav.2017.05.020	0	None	None				No
Journal of Animal Behaviour	JAB	Hoo are you? Tits do not respond to novel predators as threats	128	10.1016/j.anbehav.2017.04.006	0	None	None				No
Journal of Animal Behaviour	JAB	To seek or speak? Dual function of an acoustic signal limits its versatility in communication	127	10.1016/j.anbehav.2017.03.005	0	None	None				No
Journal of Animal Behaviour	JAB	Calling for help: dwarf mongoose recruitment calls inform receivers about context and elicit disparate responses	127	10.1016/j.anbehav.2017.02.018	0	None	None				No
Journal of Animal Behaviour	JAB	Dwarf mongooses use sex and identity cues in isolation calls to discriminate between callers	127	10.1016/j.anbehav.2017.02.019	0	None	None				No
Journal of Animal Behaviour	JAB	Social calls honestly signal female competitive ability in Asian particoloured bats	127	10.1016/j.anbehav.2017.03.012	0	None	None				Some supplementary videos (presumably w audio...)
Journal of Animal Behaviour	JAB	What's in a squeak? Female vocal signals predict the sexual behaviour of male house mice during courtship	126	10.1016/j.anbehav.2017.01.021	0	None	None				No
Journal of Animal Behaviour	JAB	Experimentally increased prebreeding male social behaviour has no effect on female breeding phenology and performance	126	10.1016/j.anbehav.2017.02.015	0	None	None				No
Journal of Animal Behaviour	JAB	Can common cuckoos discriminate between neighbours and strangers by their calls?	126	10.1016/j.anbehav.2017.02.013	1	Sample	Sample	Repository		Sample sound files were uploaded to the Xeno-Canto library (www.xeno-canto.org/; common cuckoos: XC323683, XC323807, XC323954, XC323955; Eurasian collared doves: XC324006, XC324031).	Yes
Journal of Animal Behaviour	JAB	Discrimination of male black-capped chickadee songs: relationship between acoustic preference and performance accuracy	126	10.1016/j.anbehav.2017.02.001	0	None	None				No
Journal of Animal Behaviour	JAB	Chestnut-sided warblers use rare song types in extreme aggressive contexts	125	10.1016/j.anbehav.2017.01.007	0	None	None				No
Journal of Animal Behaviour	JAB	Ultrasonic vocalization production and playback predicts intrapair and extrapair social behaviour in a monogamous mouse	125	10.1016/j.anbehav.2016.12.023	0	None	None				No
Journal of Animal Behaviour	JAB	A comparative study of how British tits encode predator threat in their mobbing calls	125	10.1016/j.anbehav.2017.01.011	0	None	None				No
Journal of Animal Behaviour	JAB	Do we hear what birds hear in birdsong?	124	10.1016/j.anbehav.2016.10.012	0	None	None				No
Journal of Animal Behaviour	JAB	Geographical variation in song phrases differs with their function in white-crowned sparrow song	124	10.1016/j.anbehav.2016.05.016	1	Sample	None	Repsoitory	Broken link		Should be here, broken reference link: http://portal.vertnet.org/o/blb/recordings?id=urn-lsid-biosci-ohio-state-edu-osuc-occurrences-blb21131
Journal of Animal Behaviour	JAB	To overlap or not to overlap: context-dependent coordinated singing in lekking long-billed hermits	124	10.1016/j.anbehav.2016.12.003	0	None	None				No
Marine Mammal Science	MMS	The influence of age and sex on the vocal repertoire of the Antillean manatee (Trichechus manatus manatus) and their responses to call playback	34	10.1111/mms.12467	0	None	None				No
Marine Mammal Science	MMS	Occasional acoustic presence of Antarctic blue whales on a feeding ground in southern Chile	34	10.1111/mms.12441	0	None	None				No
Marine Mammal Science	MMS	Two‚Äêcomponent calls in short‚Äêfinned pilot whales (Globicephala macrorhynchus)	34	10.1111/mms.12452	0	None	None				No
Marine Mammal Science	MMS	Variability in blue whale acoustic behavior off southern California	34	10.1111/mms.12458	0	None	None				No
Marine Mammal Science	MMS	Singing through winter nights: Seasonal and diel occurrence of humpback whale (Megaptera novaeangliae) calls in and around the Gully MPA, offshore eastern Canada	34	10.1111/mms.12447	0	None	None				No
Marine Mammal Science	MMS	Vocalizations of captive beluga whales, Delphinapterus leucas: Additional evidence for contact signature ‚Äúmixed‚Äù calls in belugas	33	10.1111/mms.12393	0	None	None				No
Marine Mammal Science	MMS	Estimation of minke whale abundance from an acoustic line transect survey of the Mariana Islands	33	10.1111/mms.12397	0	None	None				No
Marine Mammal Science	MMS	Upcall production by southern right whale (Eubalaena australis) mother‚Äêcalf pairs may be independent of diel period in a nursery area	33	10.1111/mms.12382	0	None	None				No
Marine Mammal Science	MMS	Seasonal acoustic behavior of blue whales (Balaenoptera musculus) in the Gulf of California, Mexico	33	10.1111/mms.12362	0	None	None				No
Marine Mammal Science	MMS	Acoustic classification of dolphins in the California Current using whistles, echolocation clicks, and burst pulses	33	10.1111/mms.12381	0	None	None				No
Marine Mammal Science	MMS	Using calls as an indicator for Antarctic blue whale occurrence and distribution across the southwest Pacific and southeast Indian Oceans	33	10.1111/mms.12373	0	None	None				No
Marine Mammal Science	MMS	Successful suction‚Äêcup tagging of a small delphinid species, Stenella attenuata: Insights into whistle characteristics	33	10.1111/mms.12376	0	None	None				No
Marine Mammal Science	MMS	Echolocation and burst clicks from franciscana dolphins (Pontoporia blainvillei) on the coast of Uruguay	33	10.1111/mms.12383	0	None	None				No
Marine Mammal Science	MMS	Spatial and temporal patterns in the calling behavior of beluga whales, Delphinapterus leucas, in Cook Inlet, Alaska	33	10.1111/mms.12353	0	None	None				No
Marine Mammal Science	MMS	Common nonsong social calls of humpback whales (Megaptera novaeangliae) recorded off northern Angola, southern Africa	33	10.1111/mms.12355	0	None	None				No
Marine Mammal Science	MMS	Southeastern Pacific humpback whales (Megaptera novaeangliae) and their breeding grounds: Distribution and habitat preference of singers and social groups off the coast of Ecuador	33	10.1111/mms.12365	0	None	None				No
Marine Mammal Science	MMS	Insights into Blainville's beaked whale (Mesoplodon densirostris) echolocation ontogeny from recordings of mother‚Äêcalf pairs	33	10.1111/mms.12351	0	None	None				No
Marine Mammal Science	MMS	Different modes of acoustic communication in deep‚Äêdiving short‚Äêfinned pilot whales (Globicephala macrorhynchus)	33	10.1111/mms.12344	0	None	None				No
Marine Mammal Science	MMS	Communication sounds of Commerson's dolphins (Cephalorhynchus commersonii) and contextual use of vocalizations	32	10.1111/mms.12321	0	None	None				No
Marine Mammal Science	MMS	Further insights into postpartum signature whistle use in bottlenose dolphins (Tursiops truncatus)	32	10.1111/mms.12317	0	None	None				No
